# Supplementary material for: The Largest Subunit of RNA Polymerase II as a New Marker Gene to Study Assemblages of Arbuscular Mycorrhizal Fungi in the Field
Source: PLOS journal article supplement (doi:10.1371/journal.pone.0107783), 2014-10-02
Supplement: S2 (10.1371/journal.pone.0107783.s002) [file journal.pone.0107783.s002]

Figure S1: Overview of long-term tillage experimental field site in Tänikon (Switzerland).

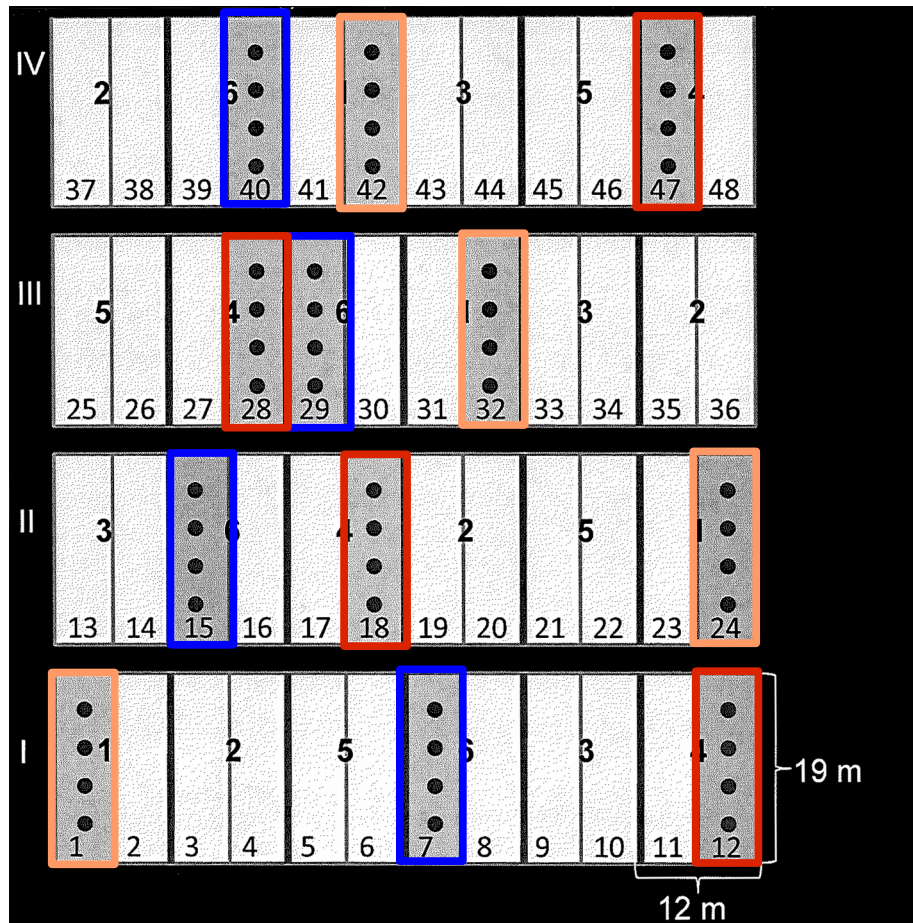

Long-term tillage experiment in Tänikon (Switzerland).  
Sampling details (Börstler *et al* 2010 and  
Jansa *et al.* 2002 & 2003)

No Tillage

Chisel

Tillage
